# Supplementary material
Source: MDPI journal article supplement (https://www.mdpi.com/2076-3417/13/23/12851)
Supplement: s1 [file s1]

## Supplementary Data

# Evaluation of the rock mechanical properties of shale oil reservoirs in Permian Lucaogou Formation of Junggar Basin

Jian Xiong<sup>1,2\*</sup>, Renzhong Gan<sup>3</sup>, Xiangjun Liu<sup>1\*</sup>, Lixi Liang<sup>1</sup>, XiuCheng Guo<sup>4</sup>

*1.State Key Laboratory of Oil and Gas Reservoir Geology and Exploitation, Southwest Petroleum University, Chengdu, Sichuan, 610500, China; 2. National Center for International Research on Deep Earth Drilling and Resource Development, Faculty of Engineering, China University of Geosciences (Wuhan), Wuhan, 430074, China; 3. Exploration Division, PetroChina Xinjiang Oilfield Company, Karamay, Xinjiang 834000, China; 4. CNPC Greatwall Drilling Company Drilling Engineering and Technology Research Institute, Panjing, Liaoning 124010, China*

Corresponding author: Jian Xiong, [361184163@qq.com](mailto:361184163@qq.com) ; Xiangjun Liu, [13880093092@163.com](mailto:13880093092@163.com)

## Figures:

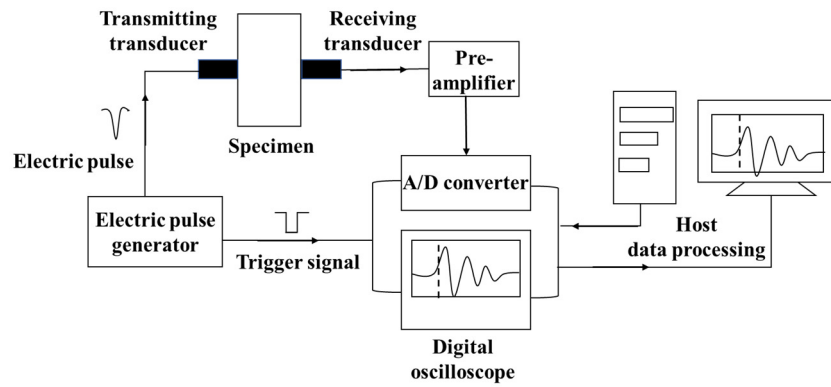

Figure S1 Schematic diagram of ultrasonic pulse test.

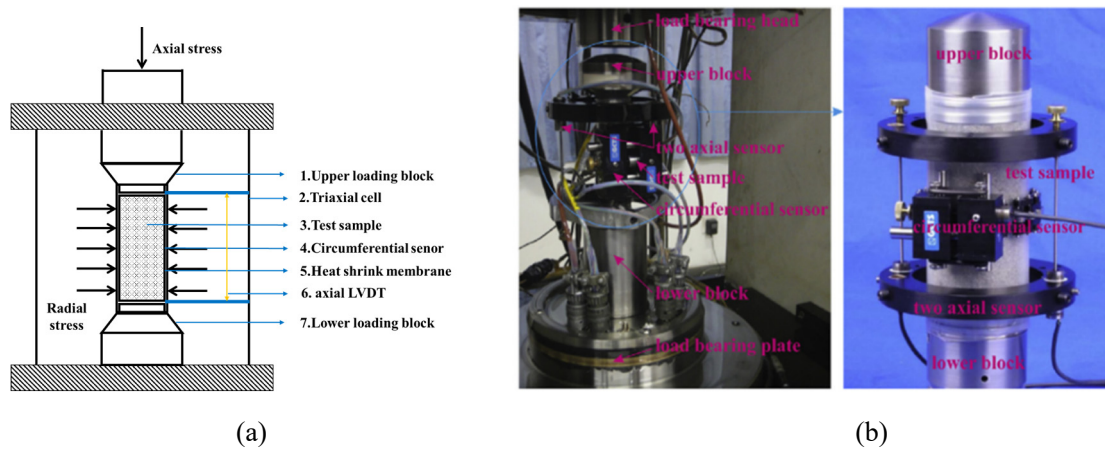

Figure S2 The experimental setup. (a) Schematic diagram of the sample in the triaxial cell; (b) RTR-1000 rock triaxial testing system (revised from Ma et al., 2016).

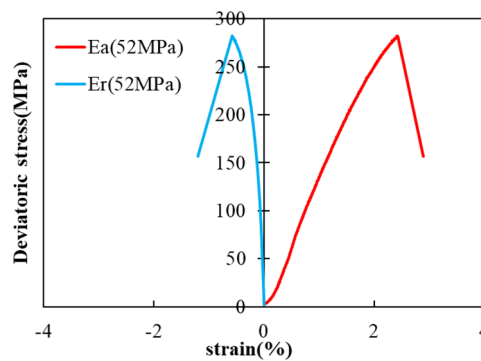

Figure S3 Deviatoric stress vs. strain curves under triaxial compression test (confining pressure of 52MPa) (Ea represents the axial strain, Er represents the radial strain.)

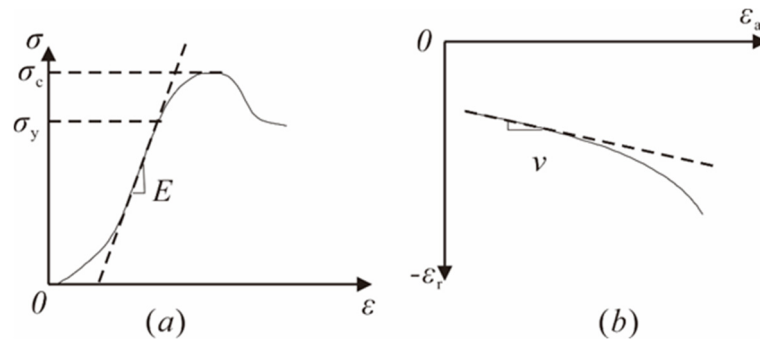

Figure S4 The calculation of the Young's modulus (a) and Poisson's ratio (b) based on the elastic deformation stage of the stress–strain curve

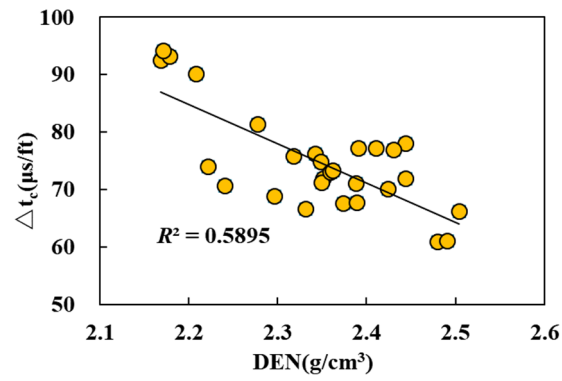

Figure S5 Relationship between DEN and  $\Delta t_c$

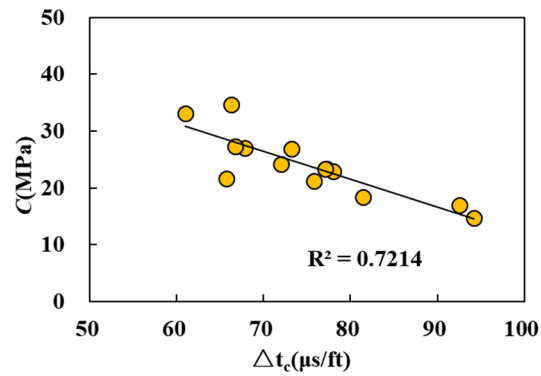

Figure S6 Relationship between  $C$  and  $\Delta t_c$

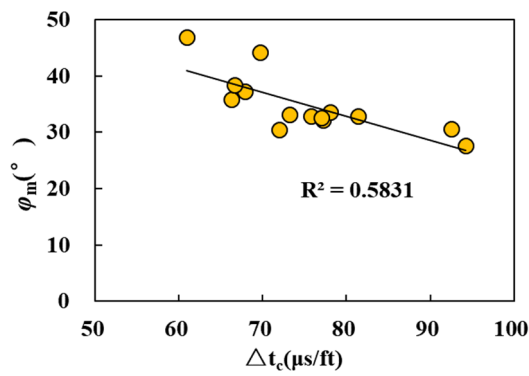

Figure S7 Relationship between  $\phi$  and  $\Delta t_c$

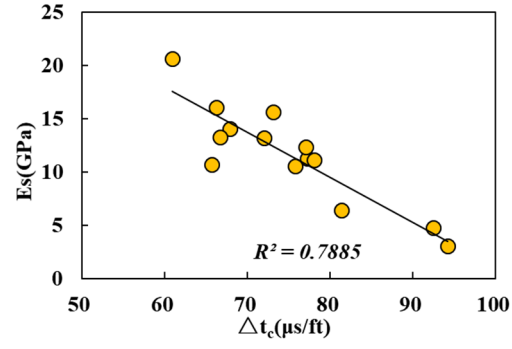

Figure S8 Relationship between  $E_s$  and  $\Delta t_c$

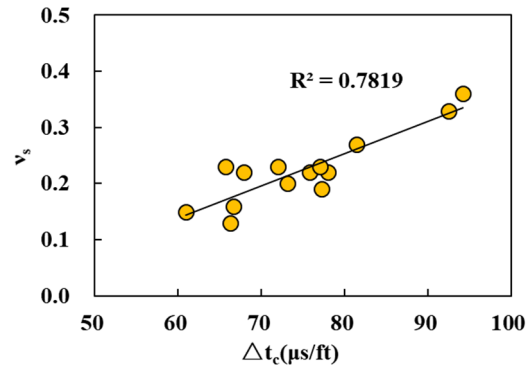

Figure S9 Relationship between  $\nu_s$  and  $\Delta t_c$

## References

Ma T., Yang C., Chen P., Wang X., Guo Y., 2016. On the damage constitutive model for hydrated shale using CT scanning technology. Journal of Natural Gas Science and Engineering, 28, 204-214.
